# Supplementary material for: Chromosome-Scale Assembly of the Dendrobium nobile Genome Provides Insights Into the Molecular Mechanism of the Biosynthesis of the Medicinal Active Ingredient of Dendrobium
Source: PubMed Central journal article supplement (PMC8921531; doi:10.3389/fgene.2022.844622), 2022-03-01
Supplement: DataSheet1.pdf [file DataSheet1.pdf]

**Table S1.** Summary of sequencing data.

| Sequencing Platform | Read length(bp) | Raw Base (Gb) | Sequence coverage (X) |
|---------------------|-----------------|---------------|-----------------------|
| MGISEQ-2000         | 150             | 130.62        | 109.8                 |
| Pacbio Sequel II    | 14,009.37       | 96.91         | 81.4                  |
| Hi-C                | 150             | 245.48        | 206.29                |

**Table S2.** Chromosome length by Hi-C assembly.

| Chromosome ID | Number of contig in chromosome | Size (bp)  |
|---------------|--------------------------------|------------|
| Chr01         | 68                             | 57,995,321 |
| Chr02         | 61                             | 64,459,299 |
| Chr03         | 60                             | 39,261,714 |
| Chr04         | 118                            | 76,253,716 |
| Chr05         | 93                             | 61,811,326 |
| Chr06         | 149                            | 90,061,196 |
| Chr07         | 63                             | 53,775,998 |
| Chr08         | 52                             | 37,776,844 |
| Chr09         | 104                            | 81,924,558 |
| Chr10         | 64                             | 41,420,473 |
| Chr11         | 94                             | 58,136,154 |
| Chr12         | 49                             | 51,326,659 |
| Chr13         | 85                             | 55,952,746 |
| Chr14         | 67                             | 44,468,460 |
| Chr15         | 77                             | 46,061,428 |
| Chr16         | 96                             | 74,496,069 |
| Chr17         | 80                             | 77,942,481 |
| Chr18         | 89                             | 95,358,005 |
| Chr19         | 96                             | 84,049,299 |

**Table S3.** Summary of assembly results.

|              | Contig        |        | Scaffold      |        |
|--------------|---------------|--------|---------------|--------|
|              | Size(bp)      | Number | Size(bp)      | Number |
| N10          | 5,229,378     | 17     | 90,061,196    | 2      |
| N20          | 3,513,425     | 45     | 84,049,299    | 3      |
| N30          | 2,647,333     | 86     | 77,942,481    | 5      |
| N40          | 2,049,888     | 137    | 76,253,716    | 6      |
| N50          | 1,618,306     | 204    | 64,459,299    | 8      |
| N60          | 1,298,484     | 287    | 58,136,154    | 10     |
| N70          | 1,004,915     | 392    | 55,952,746    | 12     |
| N80          | 696,039       | 534    | 51,326,659    | 14     |
| N90          | 392,755       | 764    | 41,420,473    | 17     |
| Max Length   | 16,050,566    | --     | 95,358,005    | --     |
| Total number | --            | 1603   | --            | 57     |
| Total Length | 1,198,962,375 | --     | 1,199,116,975 | --     |
| GC Ratio     | 0.353         | --     | 0.353         | --     |

**Table S4.** BUSCO assessment of the *Dendrobium nobile* genome assembly.

| Type                                | Number | Percentage |
|-------------------------------------|--------|------------|
| Complete BUSCOs (C)                 | 1,553  | 96.22%     |
| Complete and single-copy BUSCOs (S) | 1,508  | 93.43%     |
| Complete and duplicated BUSCOs (D)  | 45     | 2.79%      |
| Fragmented BUSCOs (F)               | 24     | 1.49%      |
| Missing BUSCOs (M)                  | 37     | 2.29%      |
| Total BUSCO groups searched         | 1,614  |            |

**Table S5.** Mapping statistics of short reads.

---

| Total reads | Mapped reads | Mapped and paired reads | Properly paired reads | Mapped rate (%) | Mapped and paired rate (%) | Properly paired rate |
|-------------|--------------|-------------------------|-----------------------|-----------------|----------------------------|----------------------|
| 848862162   | 838883774    | 837894510               | 808285086             | 98.82           | 98.71                      | 95.22                |

---

**Table S6.** Prediction of gene structures in *Dendrobium nobile*.

|         | Gene set             | Number  | Average gene length(bp) | Average CDS length(bp) | Average exon per gene | Average exon length(bp) | Average intron length(bp) |
|---------|----------------------|---------|-------------------------|------------------------|-----------------------|-------------------------|---------------------------|
| De novo | Augustus             | 132,301 | 4787.17                 | 1184.18                | 3.15                  | 375.85                  | 1675.31                   |
|         | Snap                 | 212,076 | 6813.79                 | 832.49                 | 3.82                  | 218.16                  | 2124.14                   |
| Homolog | <i>A.shenzhenica</i> | 26,182  | 7505.79                 | 1072.6                 | 3.9                   | 275.15                  | 2219.71                   |
|         | <i>A.thaliana</i>    | 18,669  | 10589.97                | 1210.2                 | 5.22                  | 231.92                  | 2223.6                    |
|         | <i>A.officinalis</i> | 18,296  | 10423.67                | 1191.53                | 5.34                  | 223.22                  | 2128.26                   |
|         | <i>G.elata</i>       | 16,367  | 10456.19                | 1255.9                 | 5.12                  | 245.07                  | 2230.5                    |
|         | <i>O.sativa</i>      | 18,898  | 10293.38                | 1237.87                | 5.13                  | 241.4                   | 2193.76                   |
|         | <i>P.equestris</i>   | 20,005  | 10397.17                | 1253.27                | 5.14                  | 243.74                  | 2207.7                    |
|         | <i>V.planifolia</i>  | 20,821  | 9425.22                 | 1127.82                | 4.88                  | 231.31                  | 2140.85                   |
| RNA-seq | transcript           | 56,303  | 18509.95                | 1007.86                | 4.63                  | 217.6                   | 4819.27                   |
| Maker   | -                    | 29,476  | 11550.65                | 1146.11                | 4.55                  | 251.83                  | 2930.01                   |

**Table S7.** Statistical results of gene sets

|           | >=30%<br>overlap |       | >=50%<br>overlap |       | >=80%<br>overlap |       |
|-----------|------------------|-------|------------------|-------|------------------|-------|
|           | No.              | Ratio | No.              | Ratio | No.              | Ratio |
| R         | 1,579            | 5.36  | 1,748            | 5.93  | 2,400            | 8.14  |
| H(single) | 38               | 0.13  | 51               | 0.17  | 111              | 0.38  |
| H(more)   | 18               | 0.06  | 39               | 0.13  | 213              | 0.72  |
| P(single) | 1,217            | 4.13  | 1,520            | 5.16  | 2,595            | 8.80  |
| P(more)   | 2,241            | 7.60  | 2,304            | 7.82  | 1,852            | 6.28  |
| HR        | 152              | 0.52  | 295              | 1.00  | 1,380            | 4.68  |
| PR        | 2,351            | 7.98  | 2,222            | 7.54  | 2,157            | 7.32  |
| PH        | 3,151            | 10.69 | 3,288            | 11.15 | 3,343            | 11.34 |
| PHR       | 18,301           | 62.09 | 17,502           | 59.38 | 14,519           | 49.26 |
| Total     | 29,048           | 98.55 | 28,969           | 98.28 | 28,570           | 96.93 |

Note: R shows gene prediction supported by RNA-sequencing (RNA-seq); P suggests gene prediction by de novo methods; H means gene prediction by homolog methods; single: gene prediction by only one-time data supported; more: gene prediction by many time data supported; overlap: the ratio of the final gene set to the CDS region of each predicted result.

**Table S8.** BUSCO assessment of the *Dendrobium nobile* genome prediction.

| Type                                | Number | Percentage (%) |
|-------------------------------------|--------|----------------|
| Complete BUSCOs (C)                 | 1,508  | 93.43          |
| Complete and single-copy BUSCOs (S) | 1,446  | 89.59          |
| Complete and duplicated BUSCOs (D)  | 62     | 3.84           |
| Fragmented BUSCOs (F)               | 58     | 3.59           |
| Missing BUSCOs (M)                  | 48     | 2.97           |
| Total BUSCO groups searched         | 1,614  | -              |

**Table S9.** Statistics of non-coding RNA in the *Dendrobium nobile* genome.

| Type     | Copy | Average length (bp) | Total length (bp) | % of genome |
|----------|------|---------------------|-------------------|-------------|
| miRNA    | 76   | 127.25              | 9,671             | 0.000807    |
| tRNA     | 386  | 75.3601             | 29,089            | 0.002426    |
| rRNA     | 958  | 177.7902            | 170,323           | 0.014206    |
| 18S      | 261  | 385.092             | 100,509           | 0.008383    |
| 28S      | 119  | 125.1092            | 14,888            | 0.001242    |
| 5.8S     | 32   | 109.625             | 3,508             | 0.000293    |
| 5S       | 546  | 94.17216            | 51,418            | 0.004289    |
| snRNA    | 457  | 114.5405            | 52,345            | 0.004366    |
| CD-box   | 272  | 105.1654            | 28,605            | 0.002386    |
| HACA-box | 24   | 130.875             | 3,141             | 0.000262    |
| splicing | 161  | 127.9441            | 20,599            | 0.001718    |

**Table S10.** Statistical results of repeat sequences.

| Type              | Repeat Size(bp) | % of genome |
|-------------------|-----------------|-------------|
| TRF               | 47,646,963      | 3.974017    |
| RepeatMasker      | 164,446,337     | 13.715721   |
| RepeatProteinMask | 172,675,014     | 14.402038   |
| De novo           | 695,501,841     | 58.008646   |
| Total             | 732,188,741     | 61.068534   |

**Table S11.** Statistics of repeat sequences in *Dendrobium nobile*.

|         | Type      | Length(bp)  | % of genome |
|---------|-----------|-------------|-------------|
| Retro   | LTR/Copia | 349,879,529 | 29.18186    |
|         | LTR/Gypsy | 253,972,999 | 21.18273    |
|         | LTR/Other | 11,376,510  | 0.94886     |
|         | SINE      | 13,596      | 0.00113     |
|         | LINE      | 61,853,346  | 5.15891     |
|         | Other     | 43,021      | 0.00359     |
| DNA     | EnSpm     | 7,918,050   | 0.66041     |
|         | Harbinger | 645,889     | 0.05387     |
|         | hAT       | 10,062,319  | 0.83925     |
|         | Helitron  | 1,588,457   | 0.13249     |
|         | Mariner   | 92          | 1.00E-05    |
|         | MuDR      | 2,787,978   | 0.23253     |
|         | P         | 0           | 0           |
| Other   | 700,820   | 0.05845     |             |
| Other   | -         | 1,020,027   | 0.08508     |
| Unknown | -         | 24,129,963  | 2.01257     |
| Total   | -         | 695,501,841 | 58.00865    |

LINE, long interspersed nuclear element; SINE, short interspersed element; LTR, long terminal repeat.  
Unknown repeat sequences could not be clustered by Repeat Masker.

**Table S12.** Statistical results of functional annotation.

| Values     | Total  | Nr     | Swissprot | KEGG   | KOG    | TrEMBL | Interpro | GO     | Overall |
|------------|--------|--------|-----------|--------|--------|--------|----------|--------|---------|
| Number     | 29,476 | 27,601 | 19,855    | 20,215 | 19,801 | 25,870 | 24,044   | 3,583  | 27,765  |
| Percentage | -      | 93.64% | 67.36%    | 68.58% | 67.18% | 87.77% | 81.57%   | 12.16% | 94.20%  |

**Table S13.** The statistics of gene families clustering in *Dendrobium nobile*.

| Species                | Genes number | Genes in families | Unclustered genes | Family number | Unique families | Average genes per family |
|------------------------|--------------|-------------------|-------------------|---------------|-----------------|--------------------------|
| <b><i>D.nobile</i></b> | <b>29214</b> | <b>23220</b>      | <b>5994</b>       | <b>14860</b>  | <b>361</b>      | <b>1.56</b>              |
| <i>D.catenatum</i>     | 29257        | 23663             | 5594              | 15338         | 825             | 1.54                     |
| <i>D.chrysotoxum</i>   | 30045        | 24209             | 5836              | 14012         | 552             | 1.73                     |
| <i>C.sinense</i>       | 29638        | 21776             | 7862              | 14202         | 716             | 1.53                     |
| <i>A.trichopoda</i>    | 26846        | 19399             | 7447              | 12493         | 1048            | 1.55                     |
| <i>S.polyrhiza</i>     | 19592        | 16299             | 3293              | 11547         | 363             | 1.41                     |
| <i>A.shenzhenica</i>   | 21743        | 18622             | 3121              | 11994         | 487             | 1.55                     |
| <i>A.officinalis</i>   | 27395        | 19848             | 7547              | 12113         | 863             | 1.64                     |
| <i>O.sativa</i>        | 42173        | 31032             | 11141             | 17136         | 1335            | 1.81                     |
| <i>A.comosus</i>       | 27024        | 22201             | 4823              | 13128         | 692             | 1.69                     |
| <i>M.acuminata</i>     | 35864        | 25477             | 10387             | 12697         | 518             | 2.01                     |
| <i>P.dactylifera</i>   | 25321        | 22834             | 2487              | 12730         | 219             | 1.79                     |
| <i>V.vinifera</i>      | 31315        | 23950             | 7365              | 14070         | 924             | 1.7                      |
| <i>P.equestris</i>     | 29413        | 22096             | 7317              | 14185         | 570             | 1.56                     |
| <i>S.bicolor</i>       | 34129        | 26911             | 7218              | 16439         | 764             | 1.64                     |
| <i>P.trichocarpa</i>   | 42945        | 33831             | 9114              | 14533         | 1154            | 2.33                     |
| <i>A.thaliana</i>      | 27342        | 23587             | 3755              | 12844         | 716             | 1.84                     |
| <i>G.elata</i>         | 18000        | 13895             | 4105              | 10828         | 264             | 1.28                     |

**Table S14.** KEGG enrichment results of significantly expanded gene families in *Dendrobium nobile* (see separate files).

**Table S15.** Statistical results of whole gene collinearity analysis.

| Species1         | Species2              | Number of Synteny Blocks | Number of Synteny Genes in All Blocks |
|------------------|-----------------------|--------------------------|---------------------------------------|
| <i>D. nobile</i> | <i>D. chrysotoxum</i> | 120                      | 31,498                                |
| <i>D. nobile</i> | <i>V. planifolia</i>  | 1,404                    | 25,166                                |
| <i>D. nobile</i> | <i>C. sinense</i>     | 430                      | 30,650                                |

**Table S16.** The genes numbers in the polysaccharide synthesis pathway in five orchid species and *Arabidopsis thaliana*.

|     | Gene family   | Ash | Peq | Dca | Guchui | JC | AT |
|-----|---------------|-----|-----|-----|--------|----|----|
| NI  | Cytosolic     | 3   | 3   | 3   | 7      | 4  | 5  |
|     | Mitochondria  | 2   | 2   | 3   | 1      | 2  | 3  |
|     | Chloroplastic | 1   | 1   | 1   | 1      | 1  | 1  |
| PGM | pPGM          | 1   | 1   | 1   | 1      | 1  | 1  |
|     | cPGM          | 1   | 1   | 1   | 5      | 1  | 2  |
| SPS | SPS1/2F       | 1   | 2   | 1   | 1      | 1  | 2  |
|     | SPS3F         | 1   | 1   | 1   | 1      | 1  | 1  |
|     | SPS4F         | 0   | 0   | 1   | 1      | 1  | 1  |
| SUS | SUS1/4        | 2   | 3   | 3   | 2      | 2  | 2  |
|     | SUS2/3        | 1   | 1   | 1   | 1      | 1  | 2  |
|     | SUS5/6        | 1   | 2   | 1   | 1      | 1  | 2  |
| UGP | UGP1/2        | 1   | 1   | 1   | 1      | 1  | 2  |
|     | UGP3          | 1   | 1   | 1   | 1      | 1  | 1  |
| UGE | GROUP1        | 3   | 5   | 4   | 6      | 5  | 5  |
|     | GROUP2        | 5   | 4   | 5   | 4      | 0  | 6  |

Species abbreviations are as follows: Ash, *Apostasia shenzhenica*; Peq, *Phalaenopsis equestris*; Dca, *Dendrobium catenatum*; Guichui, *Dendrobium chrysotoxum*; JC, *Dendrobium nobile*; AT, *Arabidopsis thaliana*.

Genes encoding enzymes abbreviations are as follows: PGM, phosphoglucomutase; UGP, UDP-glucose pyrophosphorylase; SPS, sucrose-phosphate synthase; SUS, sucrose synthase; UGE, UDP galacturonate 4-epimerase; NI, Alkaline/neutral invertase.

Green color shows the varying gene numbers in different gene family branches; yellow color shows the *Dendrobium*-specific genes.

**Table S17.** The gene numbers in the upstream of the alkaloid biosynthesis pathway.

|                   | <b>Gene family</b> | <b>Ash</b> | <b>Peg</b> | <b>Dca</b> | <b>Guchui</b> | <b>JC</b> | <b>AT</b> |
|-------------------|--------------------|------------|------------|------------|---------------|-----------|-----------|
| Shikimate pathway | DHS                | 2          | 2          | 3          | 2             | 3         | 3         |
|                   | DHQS               | 1          | 1          | 2          | 1             | 1         | 1         |
|                   | DHD-SKDH           | 1          | 1          | 1          | 1             | 2         | 1         |
|                   | SK                 | 1          | 1          | 1          | 1             | 1         | 2         |
|                   | SHKG               | 1          | 1          | 1          | 2             | 1         | 2         |
|                   | CS                 | 1          | 1          | 1          | 1             | 1         | 1         |
| MEP pathway       | DXS                | 2          | 5          | 2          | 2             | 2         | 2         |
|                   | DXR                | 1          | 1          | 1          | 1             | 1         | 1         |
|                   | CMS                | 1          | 1          | 1          | 1             | 1         | 1         |
|                   | CMK                | 1          | 1          | 1          | 1             | 1         | 1         |
|                   | MCS                | 1          | 1          | 1          | 1             | 1         | 1         |
|                   | HDS                | 1          | 1          | 1          | 1             | 1         | 1         |
|                   | HDR                | 1          | 1          | 1          | 1             | 1         | 1         |
| MVA pathway       | AACT               | 2          | 1          | 1          | 1             | 1         | 2         |
|                   | HMGS               | 1          | 1          | 2          | 1             | 1         | 1         |
|                   | HMGR               | 3          | 2          | 4          | 0             | 2         | 2         |
|                   | MVK                | 1          | 1          | 1          | 1             | 1         | 1         |
|                   | PMK                | 1          | 1          | 1          | 1             | 1         | 1         |
|                   | MVD                | 1          | 1          | 1          | 0             | 1         | 2         |
| STR               | STR5/6/7/8         | 0          | 0          | 0          | 0             | 0         | 4         |
|                   | STR10              | 0          | 1          | 2          | 1             | 1         | 1         |
|                   | STR12/13           | 1          | 0          | 1          | 2             | 1         | 2         |
|                   | STR11              | 1          | 0          | 1          | 1             | 1         | 1         |
|                   | STR9               | 2          | 2          | 1          | 2             | 1         | 1         |
