# Supplementary material for: Chromosome-Scale Assembly of the Dendrobium nobile Genome Provides Insights Into the Molecular Mechanism of the Biosynthesis of the Medicinal Active Ingredient of Dendrobium
Source: PubMed Central journal article supplement (PMC8921531; doi:10.3389/fgene.2022.844622), 2022-03-01
Supplement: DataSheet3.pdf [file DataSheet3.pdf]

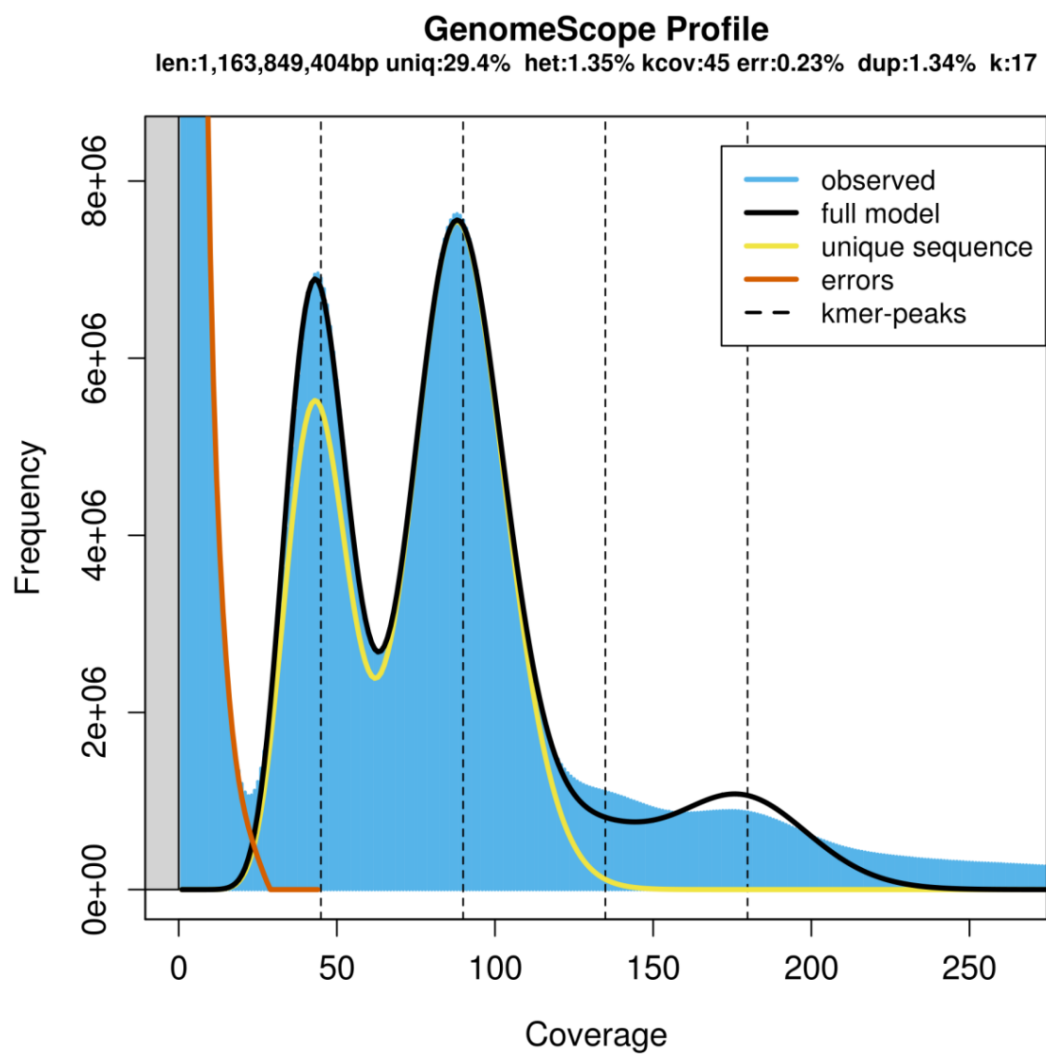

**Figure S1.** Genome size and heterozygosity estimation using 17 *K-mer* distribution.

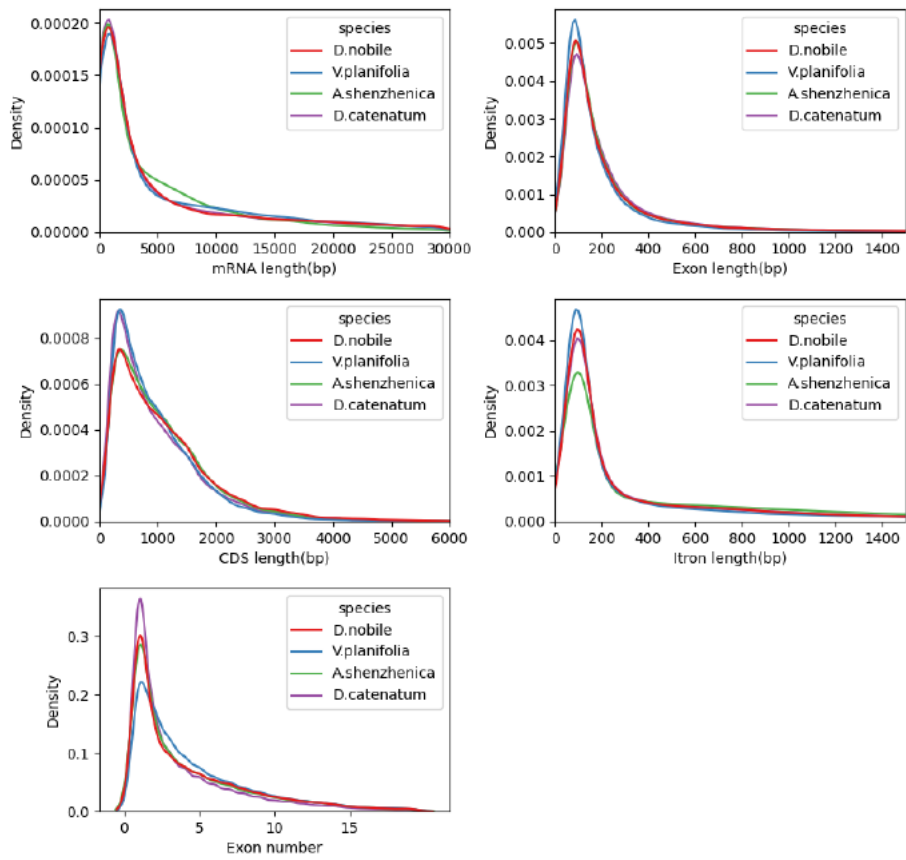

**Figure S2.** Gene structure prediction statistical results. *Dendrobium nobile* compared with the genetic elements of related species. Window refers to the length represented by each point on the horizontal coordinate.

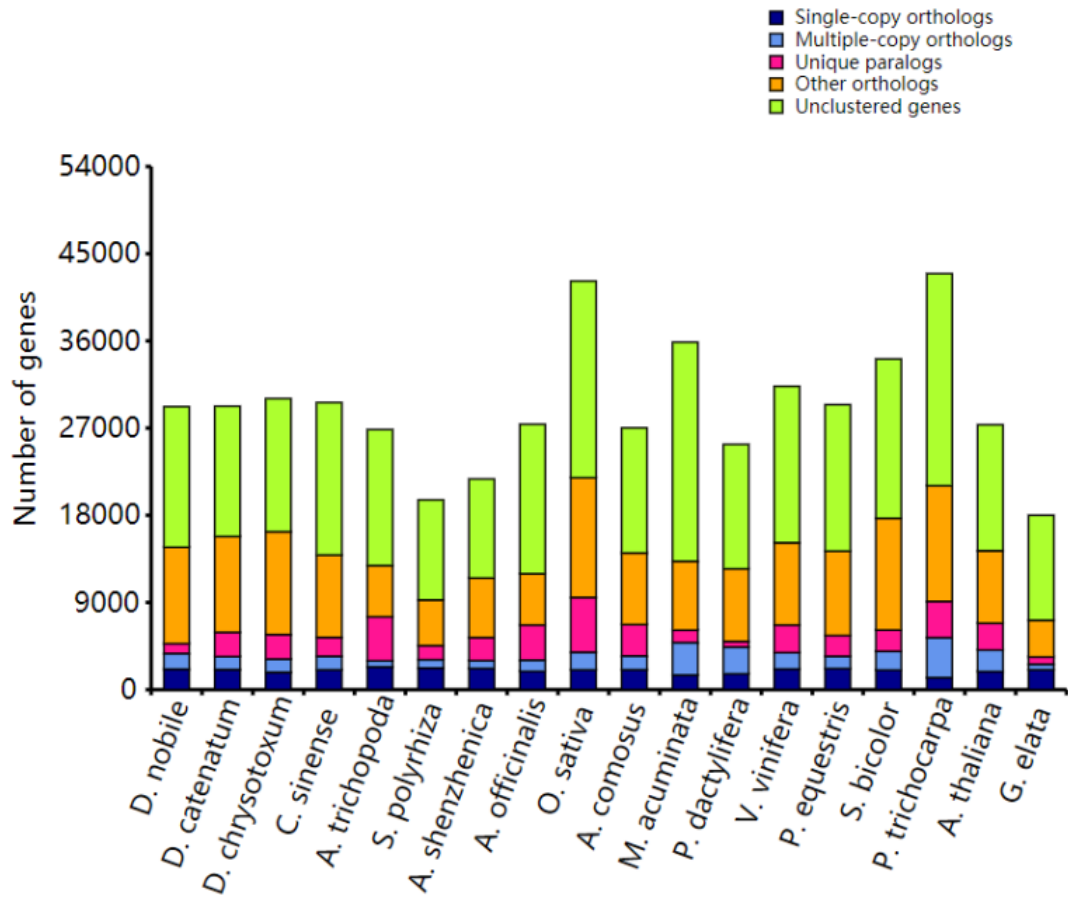

**Figure S3.** Classification and distribution of homologous gene families among species.

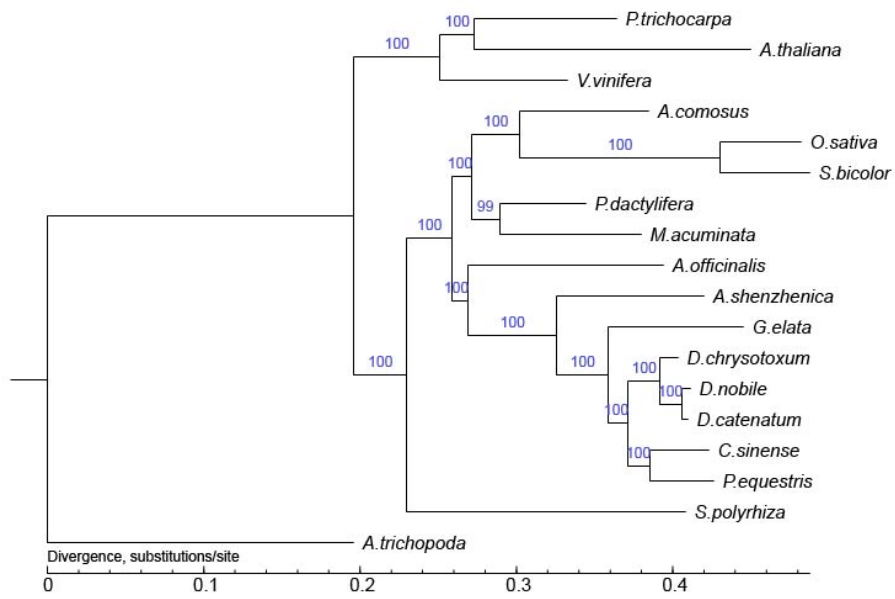

**Figure S4.** Phylogenetic tree constructed based on the filtered single-copy gene family; each branch length represents the neutral evolution rate.

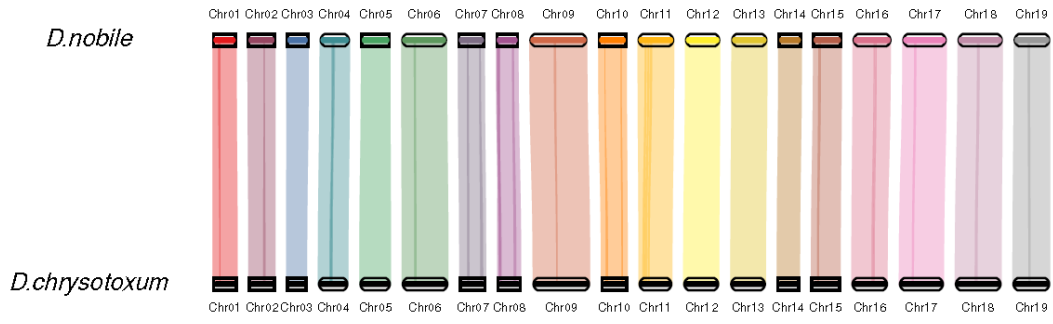

**Figure S5.** Collinear diagram between *Dendrobium nobile* and *Dendrobium chrysotoxum*.

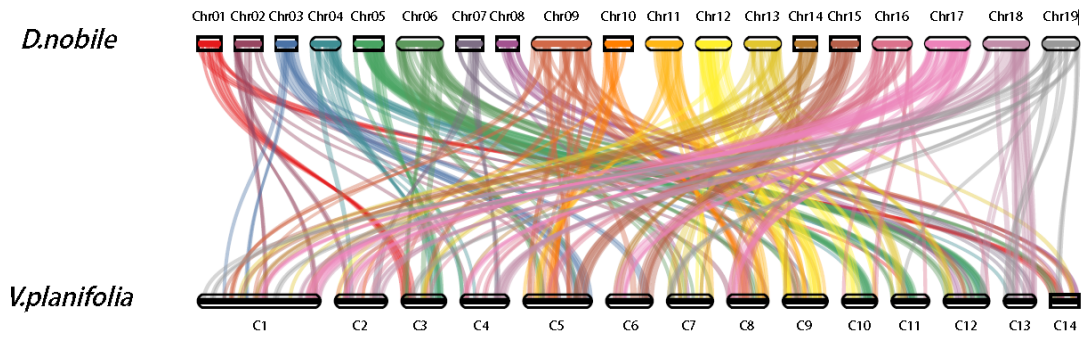

**Figure S6.** Collinear diagram between *Dendrobium nobile*, and *Vanilla planifolia*.

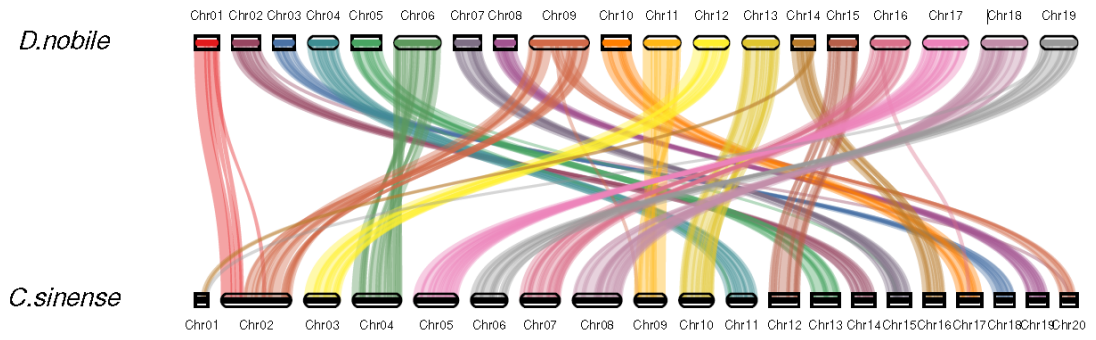

**Figure S7.** Collinear diagram between *Dendrobium nobile*, and *Cymbidium sinense*.

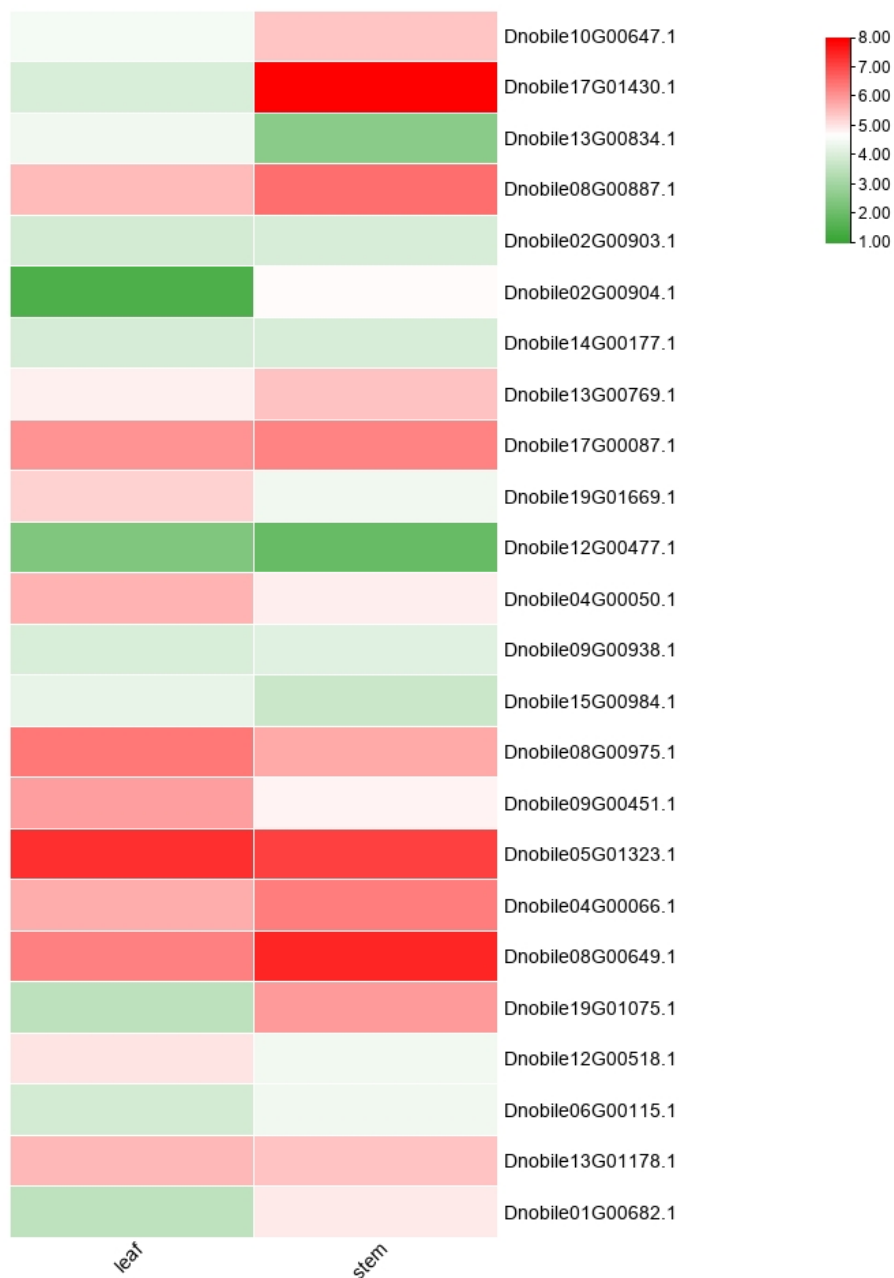

**Figure S8.** Expression patterns of genes upstream of the alkaloid biosynthesis pathway in the leaf and stem tissue of *Dendrobium nobile*. The expression levels (Log10 transformed of FPKM value) are represented by the color bar.



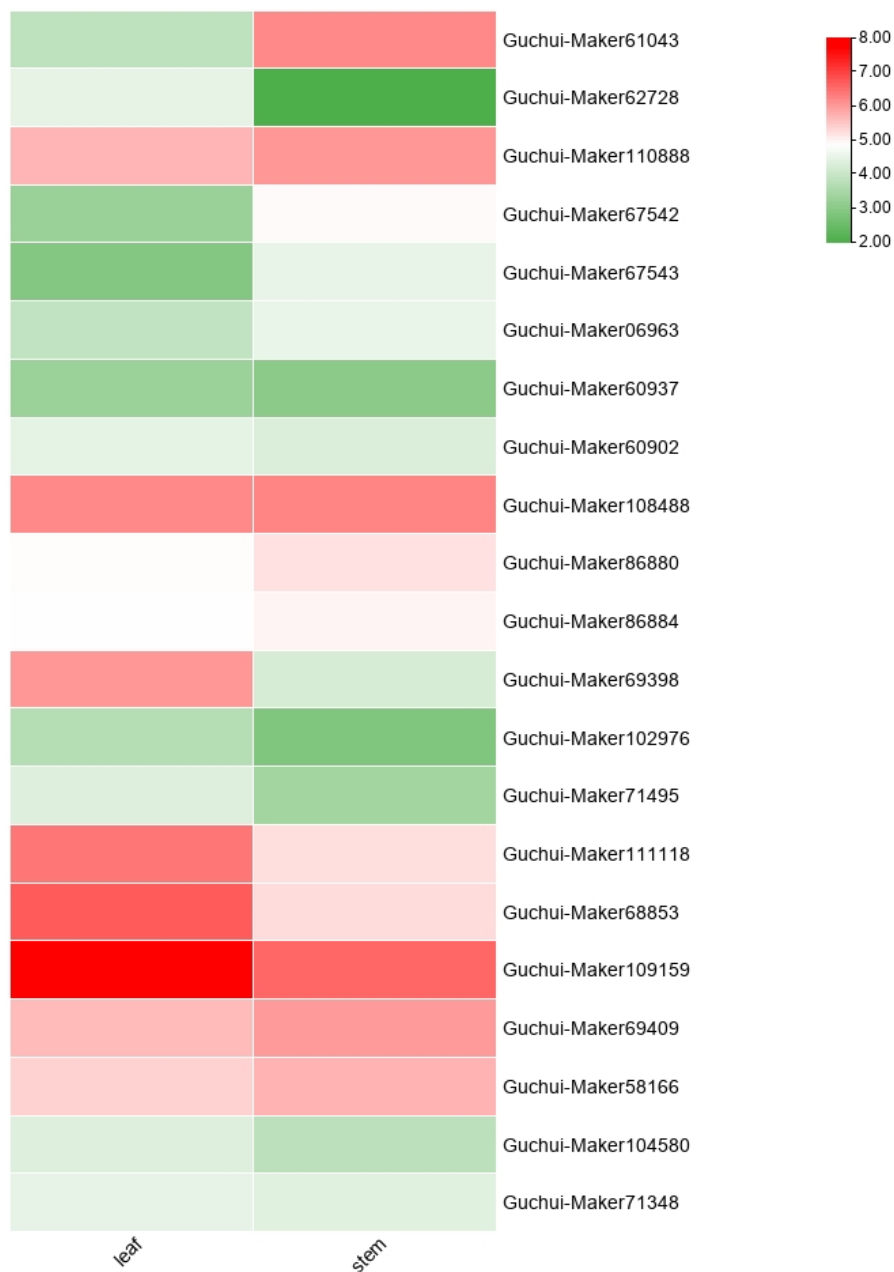

**Figure S9.** Expression patterns of genes upstream of the alkaloid biosynthesis pathway in the leaf and stem tissue of *Dendrobium chrysotoxum*. The expression levels (Log10 transformed of FPKM value) are represented by the color bar.

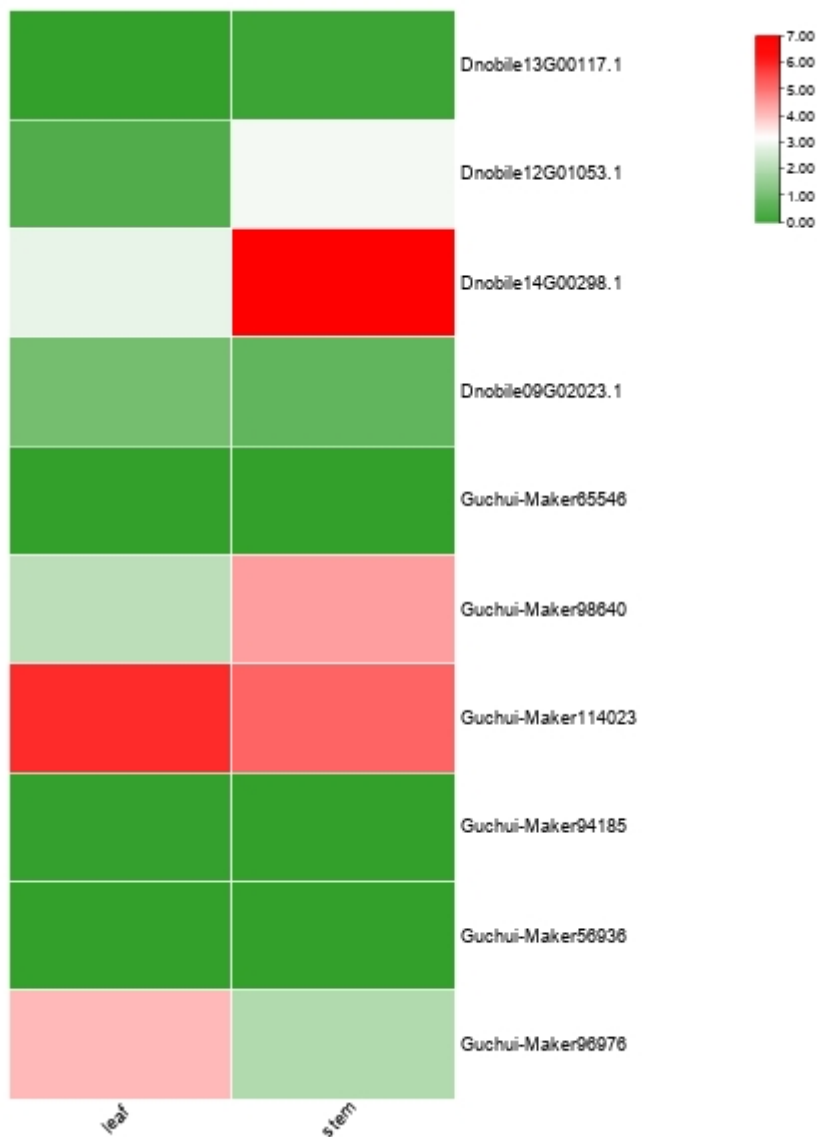

**Fig S10.** The *STR* gene expression pattern in the leaf and stem tissue of *Dendrobium nobile* and *Dendrobium chrysotoxum*. The expression levels (Log10 transformed of FPKM value) are represented by the color bar.

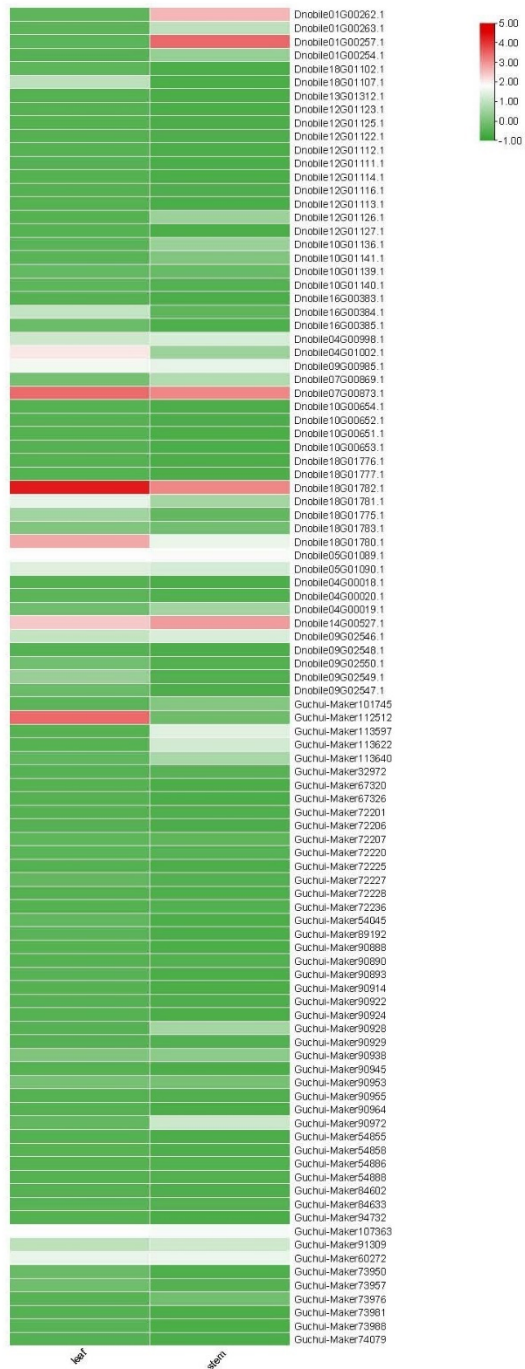

**Fig S11.** The *TPS* gene expression pattern in the leaf and stem tissue of *Dendrobium nobile* and *Dendrobium chrysotoxum*. The expression levels (Log10 transformed of FPKM value) are represented by the color bar.

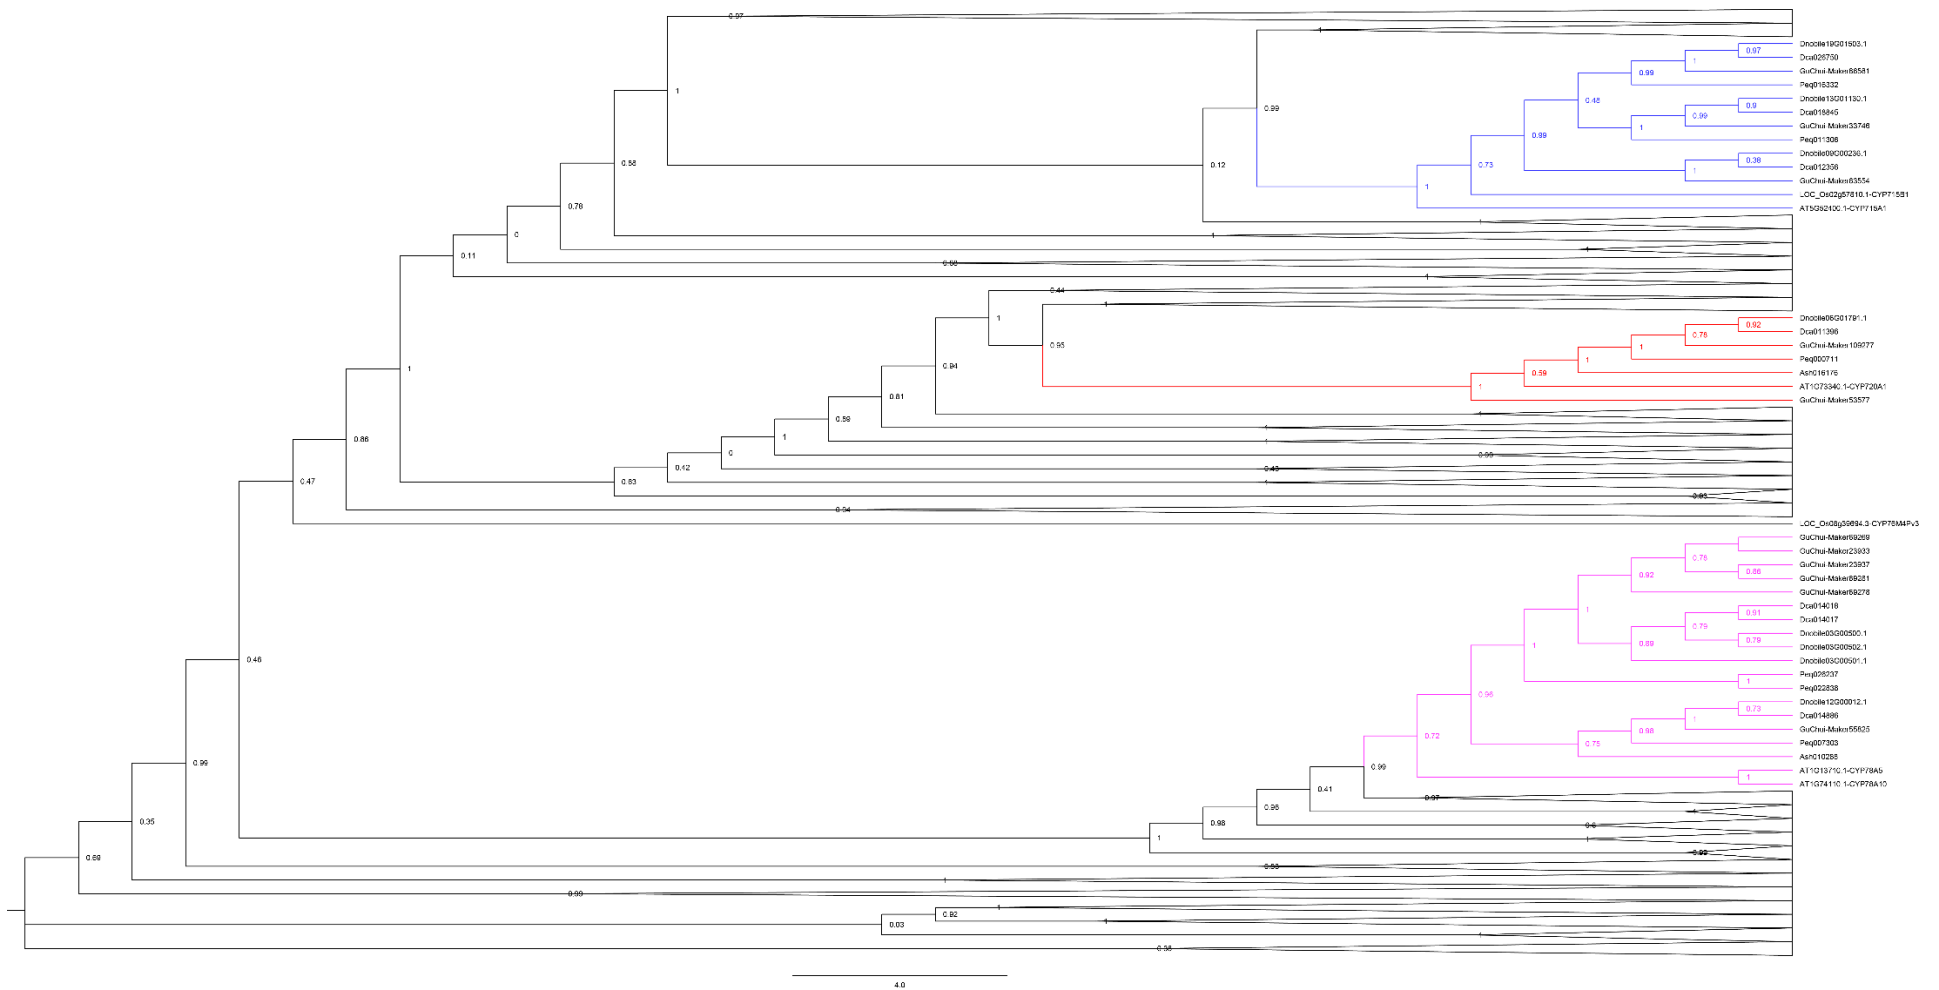

**Figure S12.** Phylogenetic analysis of *CYP450* genes in *Dendrobium nobile*, *Dendrobium chrysotoxum*, *Dendrobium catenatum*, *Apostasia shenzhenica*, *Phalaenopsis equestris*, *Arabidopsis thaliana*, and *Oryza sativa*. Dnobile, *D. nobile*; Guchui-Maker, *D. chrysotoxum*; Dca, *D. catenatum*; Ash, *A. shenzhenica*; Peq, *P. equestris*; AT, *A. thaliana*; LOC\_Os, *Oryza sativa*. The CYP720 subfamily is shown in red. Pink indicates the CYP78 subfamily. CYP715 is shown in blue.
